# Supplementary material for: Exercise Increases Adiponectin and Reduces Leptin Levels in Prediabetic and Diabetic Individuals: Systematic Review and Meta-Analysis of Randomized Controlled Trials
Source: Med Sci (Basel). 2018 Oct 30;6(4):97. doi: 10.3390/medsci6040097 (PMC6318757; doi:10.3390/medsci6040097)
Supplement: Supplementary file 1 [file medsci-06-00097-s001.pdf]

## Supplementary materials

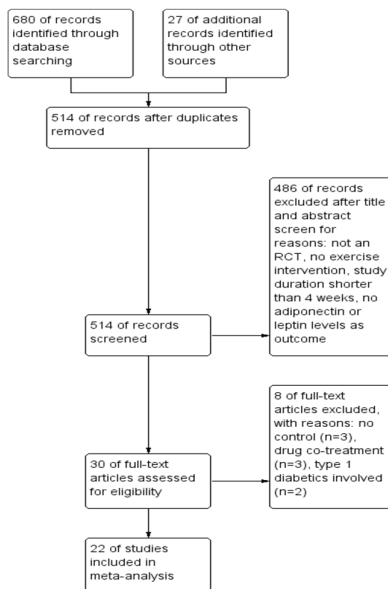

**Figure S1.** Flow diagram of study selection. RCT—randomized controlled trial.

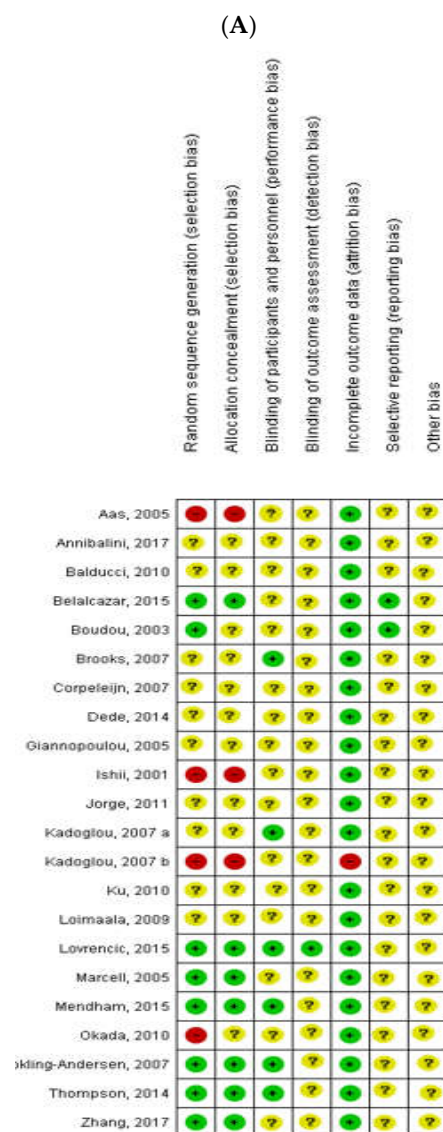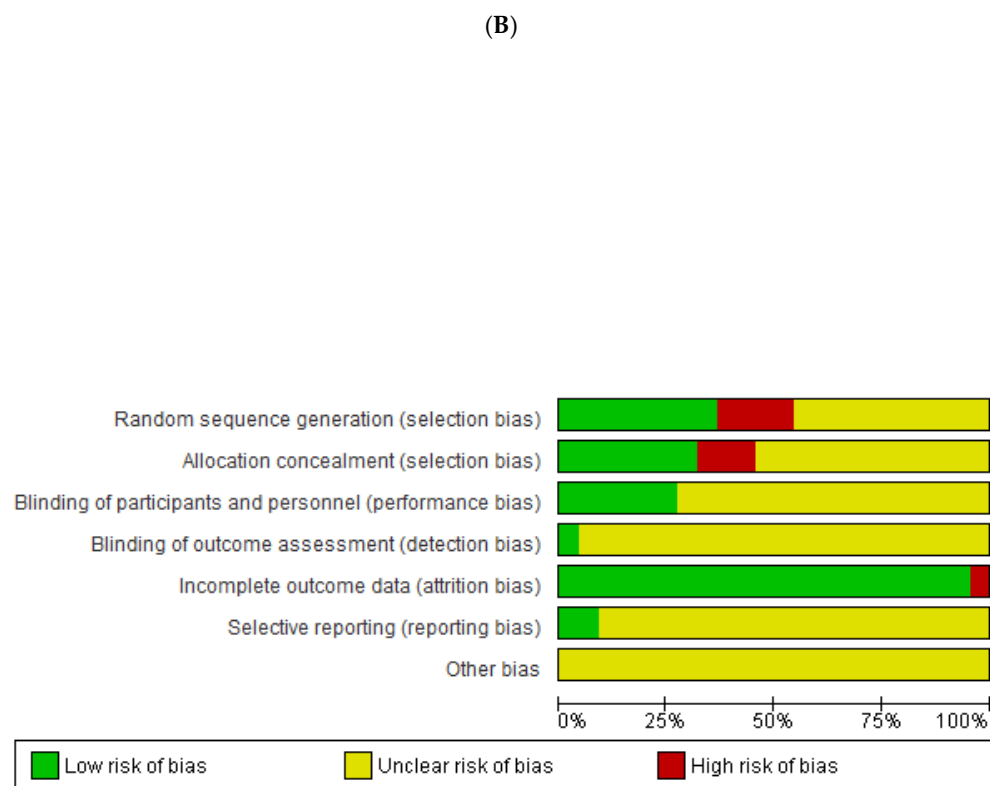

**Figure S2.** Risk of bias assessment. Each bias domain was assessed for every study included in the meta-analysis and decided it reflected a low risk of bias (green), high risk of bias (red), or if insufficient information was provided so that the risk of bias was unclear (yellow). (A) Risk of bias in individual studies. (B) Summary of risk of bias.

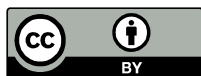

© 2018 by the authors. Submitted for possible open access publication under the terms and conditions of the Creative Commons Attribution (CC BY) license (<http://creativecommons.org/licenses/by/4.0/>).
